# Supplementary material
Source: PubMed Central journal article supplement (PMC3405188)

39,876 women in the Women's Health Study

Exclusion (n=32,701):

- Aged <65 years (n=32,218)
- Died (n=250)
- Lost to follow-up (n=233)

7,175 participants eligible for cognitive sub-study\*

Exclusion (n=798):

- Unreachable by telephone (n=296)
- Refused participation (n=502)

6,377 participants with complete initial cognitive assessment

Exclusion (n=194):

- Missing dietary data (from the food frequency questionnaire)

6,183 participants for analysis

Completed all 3 assessment waves (n=4,938)

Completed two assessments<sup>†</sup>:

- total number completing waves 1 and 2 (n=5,532)
- total number completing waves 1 and 3 (n=5,084)

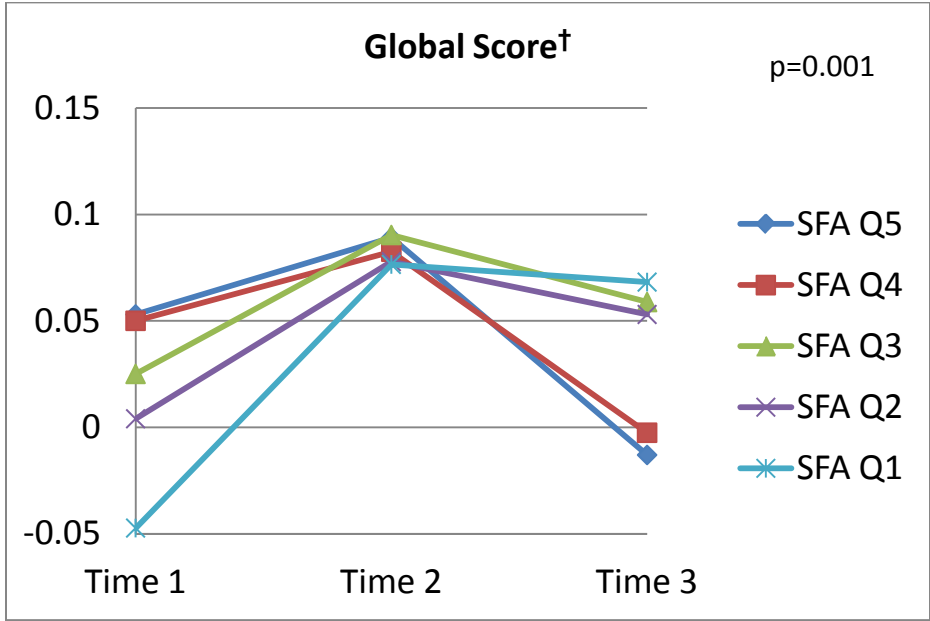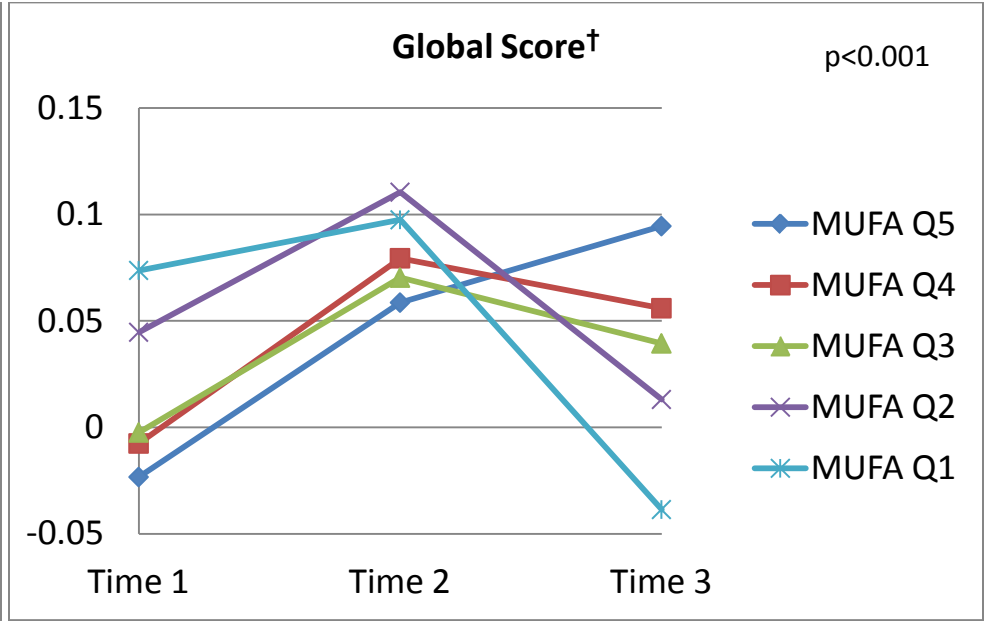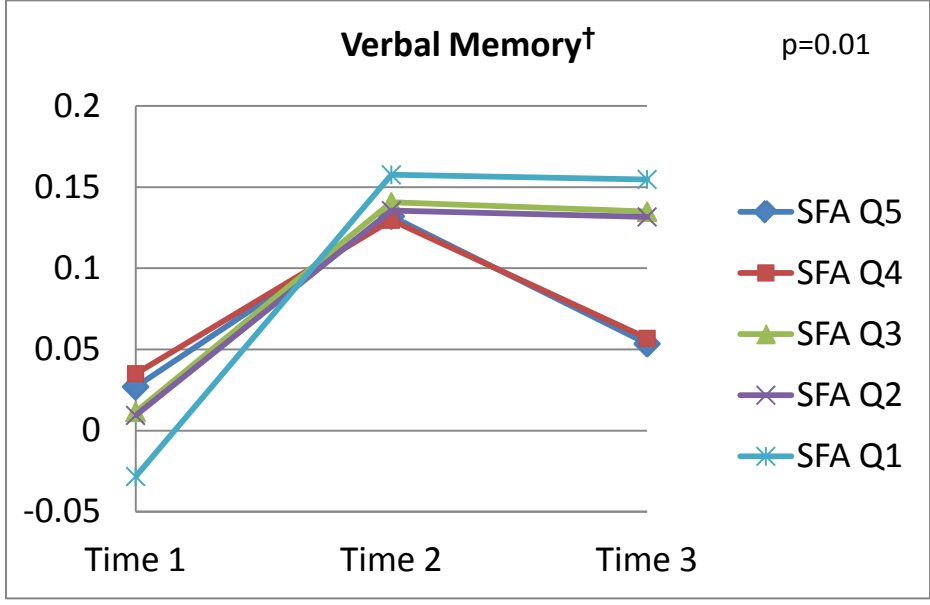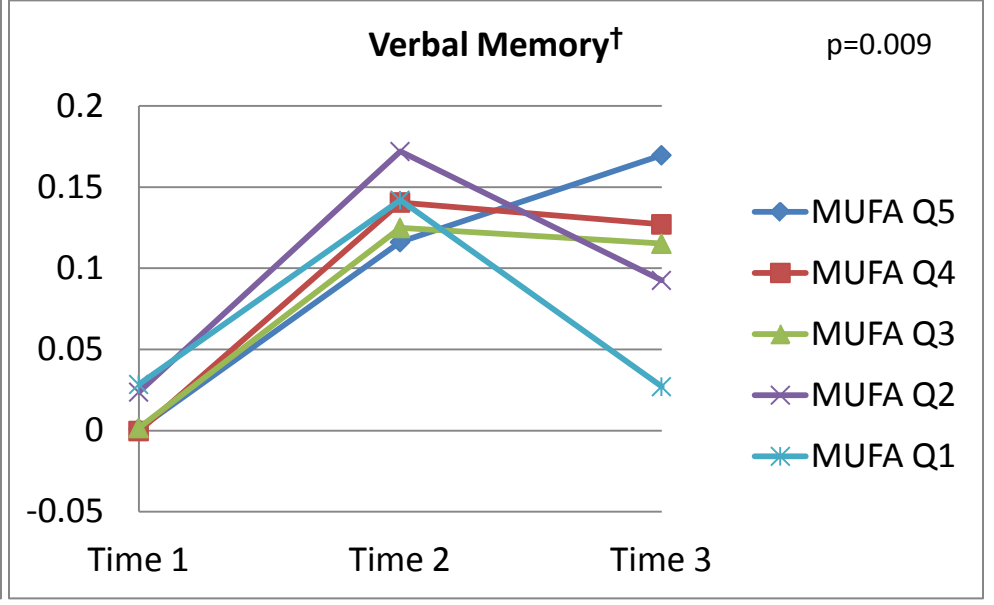

Supplement: NIHMS365507-supplement-Sup_Figures.pdf [file NIHMS365507-supplement-Sup_Figures.pdf]
